# Supplementary material for: Qualitative and Quantitative Saponin Contents in Five Sea Cucumbers from the Indian Ocean
Source: MDPI journal article supplement (doi:10.3390/md8010173), 2010-01-21

**Supplementary figure 1.** (+) LC-MS  $m/z$  1463 extracted ion chromatogram of the body wall of *Bohadschia subrubra* highlighting the presence of isomeric molecules. Retention times (min) are written on the top of each peak.

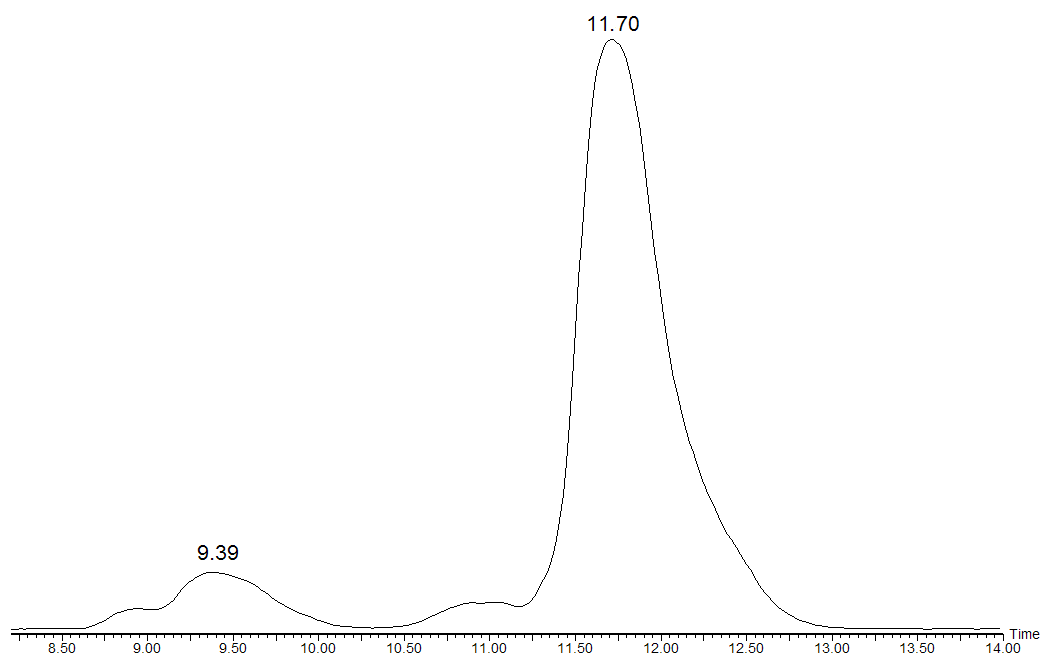

Supplement: s1 [file s1]
